# Supplementary material for: EjFAD8 Enhances the Low-Temperature Tolerance of Loquat by Desaturation of Sulfoquinovosyl Diacylglycerol (SQDG)
Source: MDPI journal article supplement (doi:10.3390/ijms24086946), 2023-04-08
Supplement: s1 [file s1]

# EjFAD8 Enhances the Low-Temperature Tolerance of Loquat by Desaturation of Sulfoquinovosyl Diacylglycerol (SQDG)

Xun Xu <sup>1,2</sup>, Hao Yang <sup>1,2</sup>, Xiaodong Suo <sup>1,2</sup>, Mingxiu Liu <sup>1,2</sup>, Danlong Jing <sup>1,2</sup>, Yin Zhang <sup>1,2</sup>, Jiangbo Dang <sup>1,2</sup>, Di Wu <sup>1,2</sup>, Qiao He <sup>1,2</sup>, Yan Xia <sup>1,2</sup>, Shuming Wang <sup>1,2</sup>, Guolu Liang <sup>1,2</sup> and Qigao Guo <sup>1,2,\*</sup>

- <sup>1</sup> Key Laboratory of Horticulture Science for Southern Mountains Regions of Ministry of Education, College of Horticulture and Landscape Architecture, Southwest University, Chongqing 400715, China; xuxun8433@163.com (X.X.); xiatian87285@163.com (H.Y.); sxd18883770582@163.com (X.S.); lmx2004121733@163.com (M.L.); jingdanlong@swu.edu.cn (D.J.); zhangyin2021@swu.edu.cn (Y.Z.); jiangbodang@swu.edu.cn (J.D.); wudisuper@swu.edu.cn (D.W.); heqiao2005@126.com (Q.H.); yansummer@swu.edu.cn (Y.X.); wangsm2018@swu.edu (S.W.); lianggl@swu.edu.cn (G.L.)
- <sup>2</sup> Academy of Agricultural Sciences of Southwest University, State Cultivation Base of Crop Stress Biology for Southern Mountainous Land of Southwest University, Chongqing 400715, China
- \* Correspondence: qgguo@126.com; Tel.: +86-023-68250383

## Supplementary Figures and Tables

### 1.1 Supplementary Figures

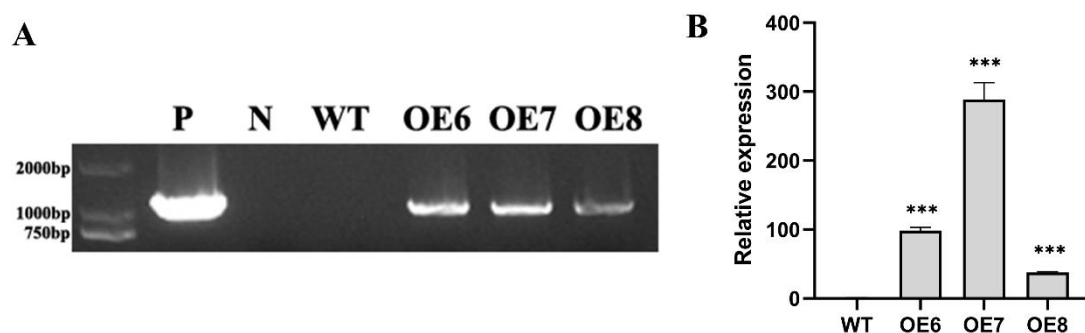

**Supplementary Figure 1.** (A) Electrophoretic results of semi-quantitative PCR for EjFAD8 in *Arabidopsis thaliana*. P, positive; N, negative. (B) The identification of overexpression *EjFAD8* transgenic *Arabidopsis*.

### 1.2 Supplementary Tables

**Supplementary Table S1** | Primers used for gene cloning and vector construction

| Primer name            | Primer F sequences (5'-3')                  | Primer R sequences (5'-3')                    |
|------------------------|---------------------------------------------|-----------------------------------------------|
| EjFAD8                 | ATGGCGACTTGGGTCCTCTC                        | CTAGGTTGAAGTGGTACTCAC                         |
| pCAMBIA230<br>0-EjFAD8 | gacagggtacccgggatccATGGCG<br>ACTTGGGTCCTCTC | gtgtcgactctagaggatccGGTTGAAGT<br>GGTACTCACTGC |

**Supplementary Table S2 | Gene source and ID**

| Gene   | Specie                      | ID             |
|--------|-----------------------------|----------------|
| AtFAD7 | <i>Arabidopsis thaliana</i> | NP_187727.1    |
| AtFAD8 | <i>Arabidopsis thaliana</i> | NP_001190230.1 |
| CiFAD8 | <i>Carya illinoensis</i>    | XP_042942544.1 |
| CsFAD8 | <i>Cannabis sativa</i>      | XP_030488828.1 |
| MdFAD7 | <i>Malus domestica</i>      | XP_028945489.1 |
| MdFAD8 | <i>Malus domestica</i>      | NP_001280916.1 |
| PaFAD7 | <i>Prunus avium</i>         | XP_021830308.1 |
| PaFAD8 | <i>Prunus avium</i>         | XP_021805633.1 |
| PbFAD8 | <i>Pyrus bretschneideri</i> | XP_048420918.1 |
| PdFAD7 | <i>Prunus dulcis</i>        | XP_034221835.1 |
| PdFAD8 | <i>Prunus dulcis</i>        | XP_034202239.1 |
| RcFAD7 | <i>Rosa chinensis</i>       | XP_024189650.1 |
| RcFAD8 | <i>Rosa chinensis</i>       | XP_024177352.1 |
| ToFAD7 | <i>Trema orientale</i>      | PON92222.1     |
| ToFAD8 | <i>Trema orientale</i>      | PON86591.1     |

**Supplementary Table S3** | Primers used for quantitative real-time PCR (qRT-PCR)

| Primer name  | Primer F sequences (5'-3') | Primer R sequences (5'-3') |
|--------------|----------------------------|----------------------------|
| EjFAD8       | CAGCGAACTGTTTCTCCCAA       | CTTGGACAGGTCCCATTGTG       |
| AtActin      | TATCGCTGACCGTATGAG         | CTGAGGGAAGCAAGAATG         |
| EjActin      | ATCCTTCGTCTGGACCTTGC       | GACAATTTCCCGTTCAGCAGT      |
| AtCBF1       | AATGTTTGGCTCCGATTACG       | CCCACTTACCGGAGTTTCTT       |
| AtCBF2       | GACCTTGGTGGAGGCTATTT       | ATCCCTTCGGCCATGTTATC       |
| AtCBF3       | TTATATGCACGATGAGGCGA       | ATGATTCCACTGTACGGACG       |
| AtICE1       | GTTTCGGGAATGAGGAGGTTT      | AACACTCTCAGCCGCTTTAC       |
| AtICE2       | TCCACAAACGCTGTCTTACC       | GTTCACTGCCTTTCCTTCTCT      |
| AtRD29A      | CTTGTCGACGAGAAGCAAAGA<br>A | TCTTGATGGAGAATTCGTGTCC     |
| AtCOR47      | TGTCATCGAAAAGCTTCACCGA     | ACCGGGATGGTAGTGGAAACT<br>G |
| AtKIN1       | ATGCCTTCCAAGCCGGTCAGAC     | CCGGTCTTGTCTTCACGAAGT      |
| AtCOR15<br>A | GTCGTCGTTTCTCAACGCAAGA     | GCTTTCTCAGCTTCTTTACCCA     |
| AtFAD4       | CCAACATCCCAAAAAGCCAC       | GAGGAAGATTCACAGTGCGT       |
| AtFAD6       | TTGGTGGAAGACATTGTGGG       | AACATGTTGGTTTTGGCGTG       |
| AtFAD7       | CTCTATTGGCTCGCTCAAGG       | CCGACCACACTGTTCAACTT       |
| AtFAD8       | ATCCGAGGAAGACACGGAGA       | GGCTGCTCTTATATCCGCCA       |

---

|        |                        |                      |
|--------|------------------------|----------------------|
| AtMGD1 | TCAAATCGTTCATGTGGTTCTC | GCCCTTTTTGCCACTTCTGT |
| AtMGD2 | TGTGAGGCCATCTTTTGAC    | TTCCCCTCCTCCCATCAGTA |
| AtMGD3 | TCATCACTAAGGCTGGTCCG   | CGTTGCCTTTTTCTGTCCA  |
| AtDGD1 | TGTGTGCAGATCACCTTCA    | AGTGGCTCTTTCGTCATTGC |
| AtDGD2 | CACCAAAAGGAACTTGCCGA   | CGGGCTGCTTCTTTGATCTC |
| AtSQD1 | TAAGCCGTTTGTTCAGGGC    | ACGCAGCTTTTTCTCGGTTT |
| AtSQD2 | ACTTGGCCTTGTGGTTCTTG   | TCCGGTTTTTCCCTCCTGAT |
| AtPGP1 | CGCAGATGACAGCACTAACC   | ACATAAAGCAAGCCAGCACC |

---
